# Supplementary material for: 3D hollow Co–Fe–P nanoframes immobilized on N,P-doped CNT as an efficient electrocatalyst for overall water splitting
Source: Royal Society of Chemistry journal article supplement (doi:10.1039/c9nr05924e), 2019-01-01
Supplement: c9nr05924e1.pdf [file c9nr05924e1.pdf]

## **3D hollow Co-Fe-P nanoframes immobilized on N,P-doped CNT as an efficient electrocatalyst for overall water splitting**

Wenxin Li,<sup>a</sup> Yuanfu Chen,<sup>\*a, b</sup> Bo Yu,<sup>a</sup> Yang Hu,<sup>a</sup> Xinqiang Wang,<sup>a</sup> Dongxu Yang<sup>a</sup>

<sup>a</sup> School of Electronic Science and Engineering, and State Key Laboratory of Electronic Thin Films and Integrated Devices, University of Electronic Science and Technology of China, Chengdu 610054, PR China.

<sup>b</sup> School of Science, Tibet University, Lhasa 850000, PR China

\*Corresponding authors. E-mails: yfchen@uestc.edu.cn (Y.F. Chen).

Address: State Key Laboratory of Electronic Thin Films and Integrated Devices, University of Electronic Science and Technology of China, Chengdu 610054, PR China.

---

## Faradaic efficiency calculation

During the OER (or HER),  $n_{O_2}(\text{experimental})$  (or  $n_{H_2}(\text{experimental})$ ) is estimated from the observed gas amount and the theoretical number of moles of oxygen (or hydrogen) evolved can be calculated using the following equation :

$$n_{O_2 \text{ or } H_2}(\text{theoretical}) = \frac{Q}{nF}$$

Where  $n_{O_2 \text{ or } H_2}$  is the number of moles of oxygen (or hydrogen) produced, Q is the charge passed through the electrodes, F is the Faradaic constant ( $96485 \text{ C mol}^{-1}$ ), and  $n$  is the number of electrons transferred during OER (four moles of electrons per mole of  $O_2$ ) or HER (two moles of electrons per mole of  $H_2$ ). Thus, Faradaic efficiency can be determined by the following equation:

$$\text{Faradaic efficiency} = \frac{n(\text{experimental})}{n(\text{theoretical})} \times 100\%$$

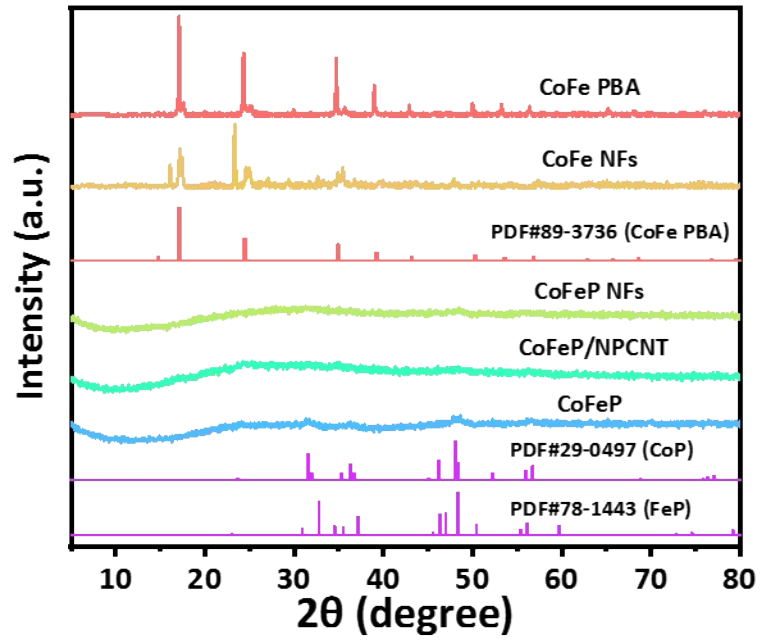

Fig. S1 XRD patterns of CoFe PBA, CoFe NFs, CoFeP NFs, CoFeP/NPCNT and CoFeP.

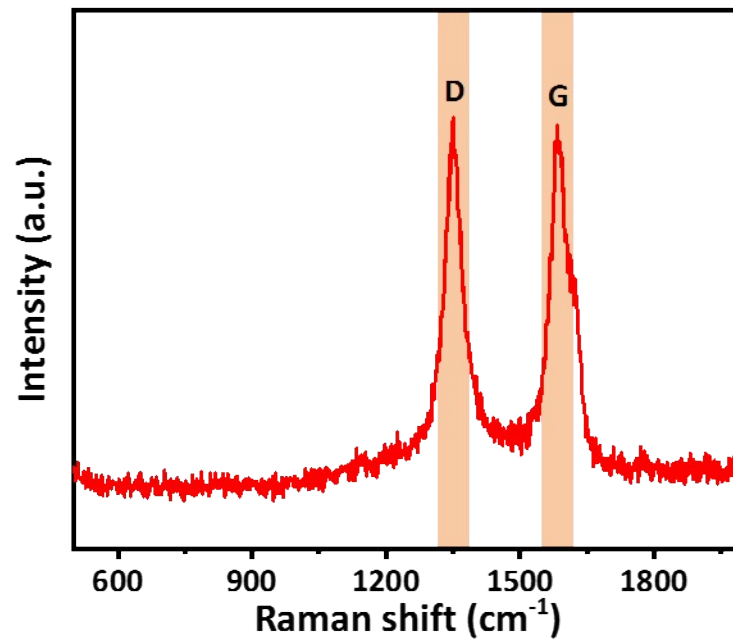

Fig. S2 Raman pattern of CoFeP NFs/NPCNT.

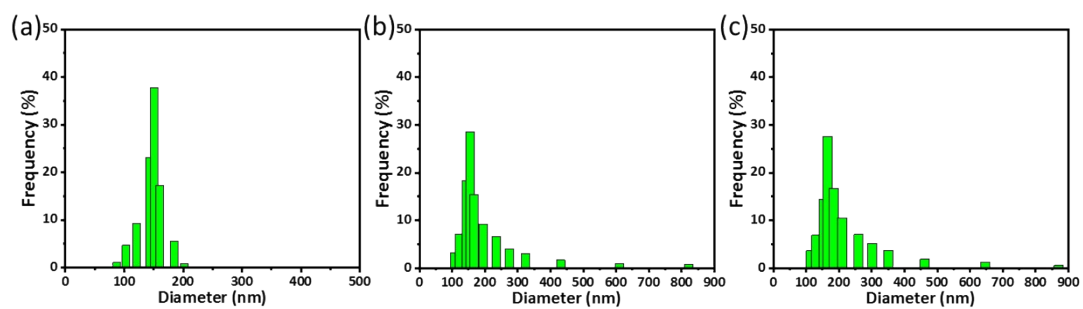

**Fig. S3** Particle size distribution histograms of (a) CoFe PBA/CNT, (b) CoFe NFs/CNT and (c) CoFeP NFs/NPCNT.

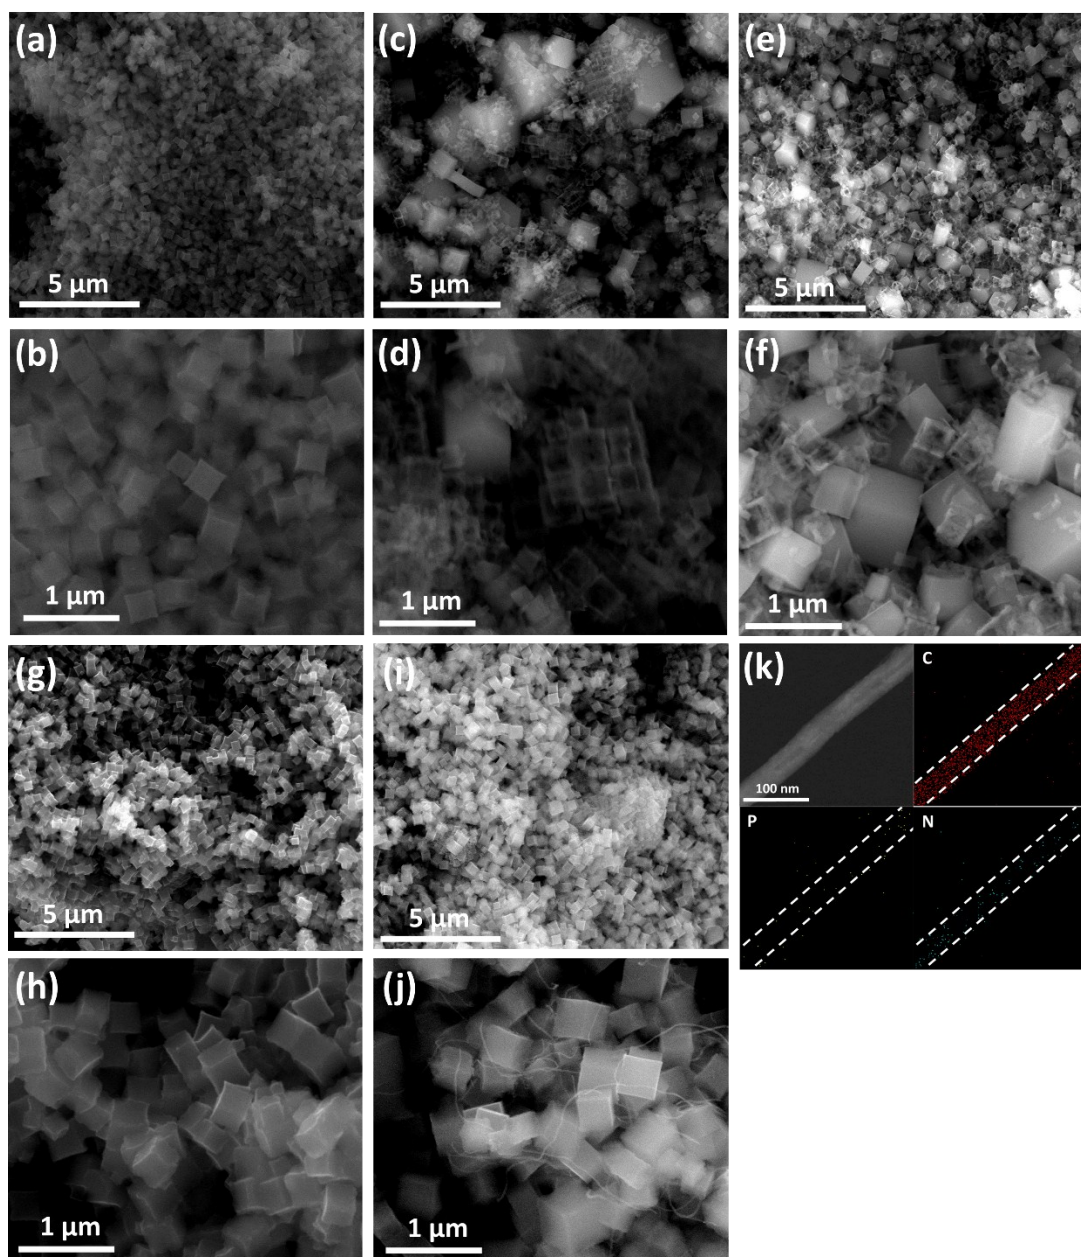

**Fig. S4** The SEM images of CoFe PBA (a-b), CoFe NFs (c-d), CoFeP NFs (e-f), CoFeP (g-h) and CoFeP/NPCNT (i-j). EDS element mapping image (k) of N,P doped CNT

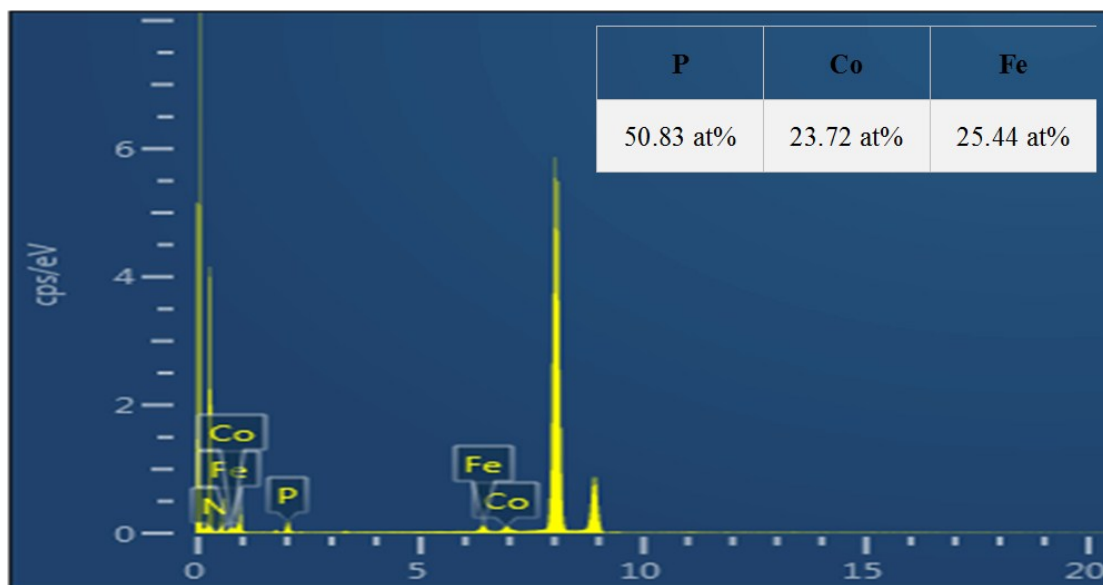

**Fig. S5** EDS spectra of the CoFeP NFs@NPCNT

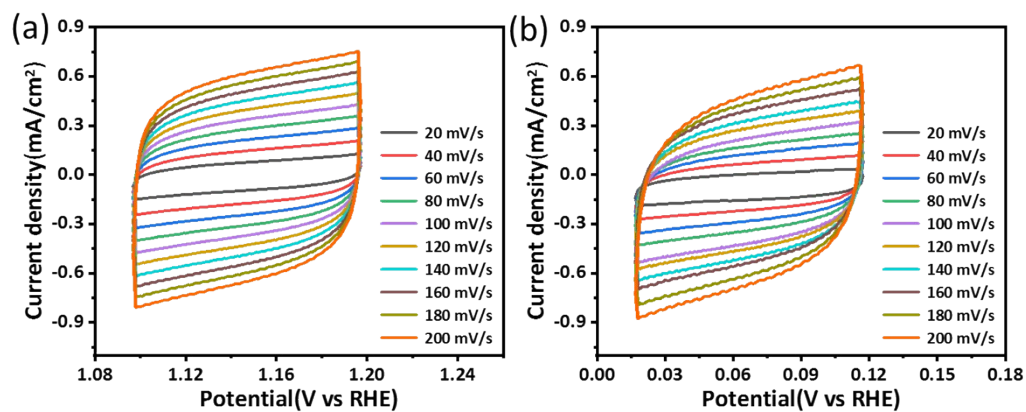

**Fig. S6** (a) The cyclic voltammograms of CoFeP NFs/NPCNT in the potential range between 1.097 to 1.197 V vs RHE for OER. (b) The cyclic voltammograms of CoFeP NFs/NPCNT in the potential range between 0.017 to 0.117 V vs RHE for HER.

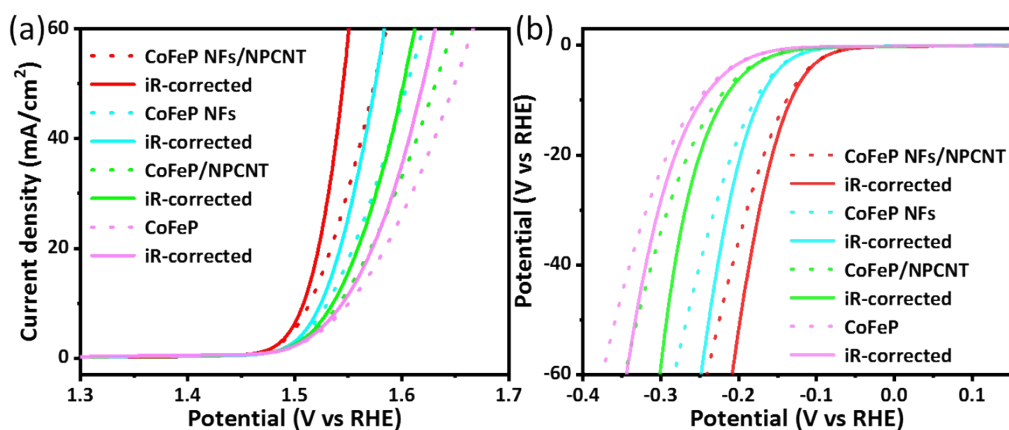

**Fig. S7** (a) OER LSV curves and (b) HER LSV curves of the catalysts in 1.0 M KOH with and without iR correction.

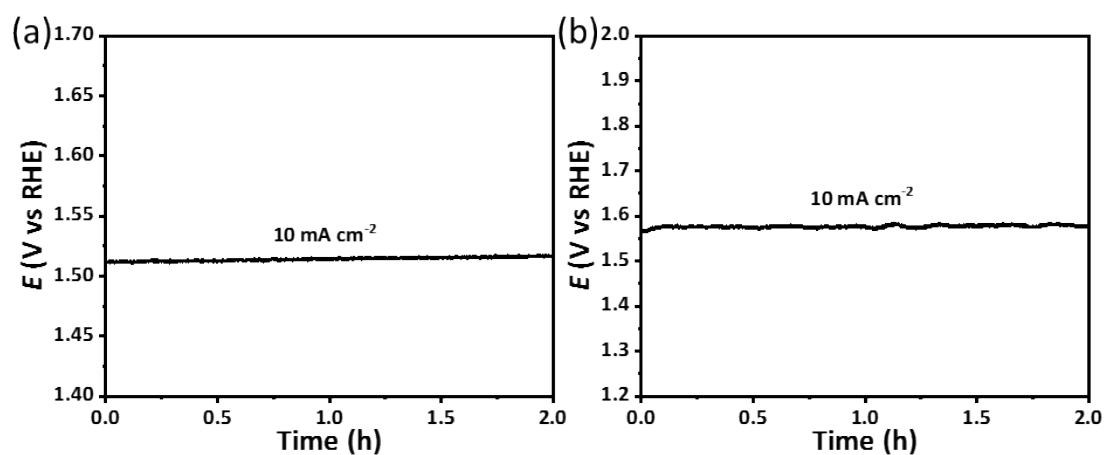

**Fig. S8** Chronopotentiometric curves of the CoFeP NFs/NPCNT catalyst at 10 mA/cm<sup>2</sup> for (a) OER and (b) water-splitting in 1.0 M KOH.

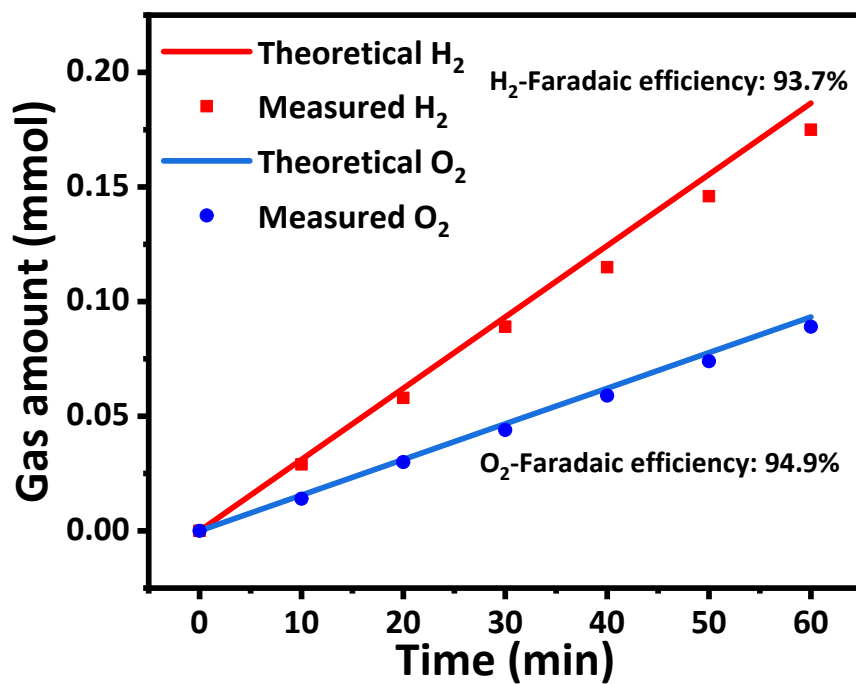

**Fig. S9** The theoretical and measured yields of H<sub>2</sub> and O<sub>2</sub> over time during electrolysis of CoFeP NFs/NPCNT electrode at the current density of 10 mA cm<sup>-2</sup>. Faradaic efficiency of CoFeP NFs/NPCNT electrode for H<sub>2</sub> and O<sub>2</sub> evolution in comparison with theoretical estimation

## Table

Table S1 Summary of OER performance of some catalysts in previous works and our work

| Samples                                           | Tafel slope (mV/dec) | Over potential (mV) @10mA/cm <sup>2</sup> | Electrolyte | References |
|---------------------------------------------------|----------------------|-------------------------------------------|-------------|------------|
| CoFeP NFs/NPCNT                                   | 42.8                 | 285                                       | 1 M KOH     | This work  |
| CoP/CoP <sub>2</sub> @ NPCNTs                     | 67                   | 300                                       | 1 M KOH     | 1          |
| porous Ni <sub>2</sub> P NS                       | 105                  | 320                                       | 1 M KOH     | 2          |
| Co <sub>0.6</sub> Fe <sub>0.4</sub> P-1.125       | 48                   | 297                                       | 1 M KOH     | 3          |
| Co <sub>2</sub> P/NPCNT                           | 53                   | 370                                       | 1 M KOH     | 4          |
| CoNi <sub>0.2</sub> Fe <sub>0.05</sub> -Z-H-P     | 48.2                 | 316                                       | 1 M KOH     | 5          |
| Co <sub>3</sub> S <sub>4</sub> @ MoS <sub>2</sub> | 43                   | 280                                       | 1 M KOH     | 6          |
| Co <sub>2</sub> P/Co-Foil                         | 79                   | 319                                       | 1 M KOH     | 7          |
| Ni <sub>x</sub> P <sub>y</sub> -325               | 72.2                 | 320                                       | 1 M KOH     | 8          |
| CoNiBO nanosheets                                 | 60                   | 300                                       | 1 M KOH     | 9          |
| NiCoFe MOF                                        | 49                   | 320                                       | 1 M KOH     | 10         |
| NiCoP/C                                           | 96                   | 330                                       | 1 M KOH     | 11         |
| Ni @ NC-800                                       | 45                   | 280                                       | 1 M KOH     | 12         |
| CNTs @ NiCoP/C                                    | 57.3                 | 297                                       | 1 M KOH     | 13         |
| NiCoP/NC PHCs                                     | 51                   | 297                                       | 1 M KOH     | 14         |



Table S2 Summary of HER performance of some catalysts in previous works and our work

| Samples                                          | Tafel slope (mV/dec) | Over potential (mV) @10mA/cm <sup>2</sup> | Electrolyte | References |
|--------------------------------------------------|----------------------|-------------------------------------------|-------------|------------|
| CoFeP NFs/NPCNT                                  | 64.1                 | 137                                       | 1 M KOH     | This work  |
| porous Ni <sub>2</sub> P NS                      | 63                   | 168                                       | 1 M KOH     | 2          |
| Co <sub>3</sub> S <sub>4</sub> @MoS <sub>2</sub> | 74                   | 136                                       | 1 M KOH     | 6          |
| Co <sub>2</sub> P/Co-Foil                        | 59                   | 157                                       | 1 M KOH     | 7          |
| Ni <sub>x</sub> P <sub>y</sub> -325              | 107.3                | 160                                       | 1 M KOH     | 8          |
| CoNiBO nanosheets                                | 116                  | 140                                       | 1 M KOH     | 9          |
| NiCoFe MOF                                       | 114                  | 270                                       | 1 M KOH     | 10         |
| Ni @ NC-800                                      | 160                  | 205                                       | 1 M KOH     | 12         |
| Ni <sub>2</sub> P/CoP NP                         | 67                   | 184                                       | 1 M KOH     | 15         |
| NiCoP/rGO                                        | 124.1                | 209                                       | 1 M KOH     | 16         |
| NiFe LDH-NS@DG10                                 | 110                  | 300                                       | 1 M KOH     | 17         |
| NDGL coated Fe-Ni                                | 133.2                | 201                                       | 1 M KOH     | 18         |
| NiS/NiS <sub>2</sub>                             | 95.1                 | 143                                       | 1 M KOH     | 19         |
| Ni <sub>1.5</sub> Fe <sub>0.5</sub> P            | 125                  | 282                                       | 1 M KOH     | 20         |
| NOGB-800                                         | 98                   | 220                                       | 1 M KOH     | 21         |

Table S3 Summary of overall water-splitting performance of some catalysts in previous works and our work

| Samples                                               | Potential (V) @10mA/cm <sup>2</sup> | References |
|-------------------------------------------------------|-------------------------------------|------------|
| CoFeP NFs/NPCNT                                       | 1.56                                | This work  |
| Co <sub>0.6</sub> Fe <sub>0.4</sub> P-1.125           | 1.57                                | 3          |
| Co <sub>3</sub> S <sub>4</sub> @ MoS <sub>2</sub>     | 1.58                                | 6          |
| Co <sub>2</sub> P/Co-Foil                             | 1.71                                | 7          |
| Ni <sub>x</sub> P <sub>y</sub> -325                   | 1.57                                | 8          |
| CoNiBO nanosheets                                     | 1.69                                | 9          |
| Ni @ NC-800                                           | 1.6                                 | 12         |
| NiCoP/rGO                                             | 1.59                                | 16         |
| NDGL coated Fe-Ni                                     | 1.701                               | 18         |
| NiS/NiS <sub>2</sub>                                  | 1.62                                | 19         |
| NOGB-800                                              | 1.65                                | 21         |
| NiCo <sub>2</sub> P <sub>2</sub> /GQD nanosheet array | 1.61                                | 22         |
| Ni-Co-P HNBS                                          | 1.62                                | 23         |
| Co <sub>4</sub> Ni <sub>1</sub> P NTs                 | 1.59                                | 24         |
| (Ni,Co)Se <sub>2</sub> -GA                            | 1.6                                 | 25         |

---

## References:

- 1 Li, H., Xu, S., Yan, H., Yang, L. and Xu, S., *Small*, 2018, 1800367.
- 2 Wang, Q., Liu, Z., Zhao, H., Huang, H., Jiao, H. and Du, Y., *J. Mater. Chem. A*, 2018.
- 3 Lian, Y., Sun, H., Wang, X., Qi, P., Mu, Q., Chen, Y., Ye, J., Zhao, X., Deng, Z. and Peng, Y., *Chem. Sci.*, 2019.
- 4 Das, D., Das, A., Reghunath, M. and Nanda, K.K., *Green Chem.*, 2017, **19**, 1327-1335.
- 5 Wang, M., Dong, C., Huang, Y., Li, Y. and Shen, S., *Small*, 2018, **14**, 1801756.
- 6 Guo, Y., Tang, J., Wang, Z., Kang, Y., Bando, Y. and Yamauchi, Y., *Nano Energy*, 2018, **47**, 494-502.
- 7 Yuan, C., Zhong, S., Jiang, Y., Yang, Z.K., Zhao, Z., Zhao, S., Jiang, N. and Xu, A., *J. Mater. Chem. A*, 2017, **5**, 10561-10566.
- 8 Li, J., Li, J., Zhou, X., Xia, Z., Gao, W., Ma, Y. and Qu, Y., *ACS Appl. Mater. Interfaces*, 2016, **8**, 10826-10834.
- 9 He, T., Nsanzimana, J.M.V., Qi, R., Zhang, J., Miao, M., Yan, Y., Qi, K., Liu, H. and Xia, B.Y., *J. Mater. Chem. A*, 2018, **6**, 23289-23294.
- 10 Ahn, W., Park, M.G., Lee, D.U., Seo, M.H., Jiang, G., Cano, Z.P., Hassan, F.M. and Chen, Z., *Adv. Funct. Mater.*, 2018, **28**, 1802129.
- 11 He, P., Yu, X. and Lou, X.W.D., *Angew. Chem. Int. Ed.*, 2017, **56**, 3897-3900.
- 12 Xu, Y., Tu, W., Zhang, B., Yin, S., Huang, Y., Kraft, M. and Xu, R., *Adv. Mater.*, 2017, **29**, 1605957.
- 13 Zhao, Y., Fan, G., Yang, L., Lin, Y. and Li, F., *Nanoscale*, 2018, **10**, 13555-13564.
- 14 Zhang, X., Huang, L., Wang, Q. and Dong, S., *J. Mater. Chem. A*, 2017, **5**, 18839-18844.
- 15 Liang, X., Zheng, B., Chen, L., Zhang, J., Zhuang, Z. and Chen, B., *ACS Appl. Mater. Interfaces*, 2017, **9**, 23222-23229.
- 16 Li, J., Yan, M., Zhou, X., Huang, Z., Xia, Z., Chang, C., Ma, Y. and Qu, Y., *Adv. Funct. Mater.*, 2016, **26**, 6785-6796.
- 17 Jia, Y., Zhang, L., Gao, G., Chen, H., Wang, B., Zhou, J., Soo, M.T., Hong, M., Yan, X., Qian, G., Zou, J., Du, A. and Yao, X., *Adv. Mater.*, 2017, **29**, 1700017.
- 18 Zhang, L., Hu, J., Huang, X., Song, J. and Lu, S., *Nano Energy*, 2018, **48**, 489-499.
- 19 Li, Q., Wang, D., Han, C., Ma, X., Lu, Q., Xing, Z. and Yang, X., *J. Mater. Chem. A*, 2018, **6**, 8233-8237.
- 20 Huang, H., Yu, C., Zhao, C., Han, X., Yang, J., Liu, Z., Li, S., Zhang, M. and Qiu, J., *Nano Energy*, 2017, **34**, 472-480.
- 21 Hu, Q., Li, G., Li, G., Liu, X., Zhu, B., Chai, X., Zhang, Q., Liu, J. and He, C., *Adv. Energy Mater.*, 2019, 1803867.
- 22 Tian, J., Chen, J., Liu, J., Tian, Q. and Chen, P., *Nano Energy*, 2018, **48**, 284-291.
- 23 Hu, E., Feng, Y., Nai, J., Zhao, D., Hu, Y. and Lou, X.W.D., *Energy Environ. Sci.*, 2018, **11**, 872-880.
- 24 Yan, L., Cao, L., Dai, P., Gu, X., Liu, D., Li, L., Wang, Y. and Zhao, X., *Adv. Funct. Mater.*, 2017, **27**, 1703455.
- 25 Xu, X., Liang, H., Ming, F., Qi, Z., Xie, Y. and Wang, Z., *ACS Catal.*, 2017, **7**, 6394-6399.
